# Supplementary material
Source: MDPI journal article supplement (https://www.mdpi.com/2073-4433/14/5/873)
Supplement: s1 [file s1]

**Table S1.** Average content of soil properties and contaminants in each district.

| District  | Clay<br>(g/kg) | Slit<br>(g/kg) | Sand<br>(g/kg) | Organic matter<br>(g/kg) | TN<br>(mg/kg) | TP<br>(mg/kg) |
|-----------|----------------|----------------|----------------|--------------------------|---------------|---------------|
| Baoan     | 116.84         | 178.69         | 668.84         | 122.83                   | 257.57        | 566.33        |
| Dapeng    | 169.06         | 234.14         | 541.49         | 108.79                   | 195.55        | 442.29        |
| Futian    | 105.59         | 201.36         | 651.19         | 35.42                    | 737.90        | 499.26        |
| Guangming | 130.66         | 163.50         | 650.93         | 139.81                   | 294.80        | 452.83        |
| Longgang  | 165.02         | 242.97         | 537.87         | 38.06                    | 378.79        | 602.09        |
| Longhua   | 117.65         | 214.42         | 586.80         | 111.05                   | 613.46        | 395.97        |
| Luohu     | 109.11         | 238.15         | 601.54         | 30.55                    | 553.44        | 572.66        |
| Nanshan   | 114.08         | 156.03         | 714.76         | 30.99                    | 592.95        | 509.03        |
| Pingshan  | 103.37         | 217.83         | 606.04         | 77.72                    | 361.47        | 967.57        |
| Yantian   | 124.24         | 262.04         | 594.81         | 40.52                    | 328.67        | 477.58        |

**Table S2.** Soil property detection results for various types of land use (mean).

| Land-use type                     | Organic matter<br>content<br>(g/kg) | Silt content<br>(g/kg) | Sand con-<br>tent<br>(g/kg) | Clay content<br>(g/kg) | TP content<br>(mg/kg) | TN con-<br>tent<br>(mg/kg) |
|-----------------------------------|-------------------------------------|------------------------|-----------------------------|------------------------|-----------------------|----------------------------|
| Paddy fields                      | 128.08                              | 207.09                 | 591.95                      | 153.47                 | 560.01                | 283.48                     |
| Irrigated land                    | 130.90                              | 206.95                 | 607.93                      | 123.00                 | 602.62                | 326.62                     |
| Dry land                          | 91.09                               | 229.61                 | 574.59                      | 140.23                 | 528.89                | 338.78                     |
| Orchards                          | 101.91                              | 206.89                 | 594.56                      | 142.74                 | 561.71                | 350.64                     |
| Tea gardens                       | 29.13                               | 213.37                 | 604.95                      | 142.10                 | 437.83                | 275.89                     |
| Other gardens                     | 85.46                               | 214.72                 | 599.93                      | 131.75                 | 590.09                | 389.13                     |
| Forest land                       | 83.20                               | 226.68                 | 581.02                      | 147.17                 | 535.29                | 316.26                     |
| Shrub land                        | 90.48                               | 207.30                 | 600.97                      | 148.53                 | 488.78                | 313.16                     |
| Other forest land                 | 82.76                               | 206.45                 | 617.39                      | 127.52                 | 564.52                | 424.45                     |
| Natural grassland                 | 28.52                               | 133.95                 | 720.83                      | 106.78                 | 450.84                | 604.59                     |
| Artificial grassland              | 164.24                              | 186.45                 | 668.77                      | 73.97                  | 443.56                | 278.77                     |
| Other grassland                   | 100.80                              | 211.08                 | 604.39                      | 131.21                 | 550.19                | 365.53                     |
| Wholesale and retail land         | 69.69                               | 200.87                 | 627.23                      | 127.40                 | 561.84                | 417.21                     |
| Accommodation and catering land   | 60.83                               | 200.87                 | 620.32                      | 132.23                 | 510.36                | 413.22                     |
| Business and financial land       | 41.05                               | 186.52                 | 672.44                      | 111.50                 | 516.18                | 510.86                     |
| Other commercial and service land | 88.02                               | 199.11                 | 620.83                      | 127.31                 | 548.40                | 387.36                     |
| Industrial land                   | 93.21                               | 201.95                 | 613.72                      | 127.32                 | 573.85                | 381.23                     |
| Mining land                       | 74.91                               | 208.87                 | 603.49                      | 137.75                 | 580.96                | 375.63                     |
| Warehouse land                    | 50.50                               | 214.17                 | 633.38                      | 123.96                 | 499.54                | 450.28                     |
| Urban residential land            | 59.38                               | 201.80                 | 631.96                      | 124.93                 | 524.67                | 492.00                     |
| Rural residential land            | 77.47                               | 210.53                 | 604.56                      | 128.64                 | 598.71                | 394.48                     |
| Institutional land                | 50.16                               | 202.72                 | 641.72                      | 118.71                 | 551.11                | 483.81                     |
| News and publishing land          | 95.06                               | 231.21                 | 611.27                      | 115.92                 | 565.31                | 502.54                     |
| Education land                    | 59.53                               | 200.57                 | 622.32                      | 129.35                 | 531.51                | 472.73                     |
| Medical and charity land          | 55.98                               | 208.68                 | 615.10                      | 130.53                 | 547.02                | 490.10                     |
| Sports and entertainment land     | 78.40                               | 202.89                 | 639.83                      | 103.71                 | 507.27                | 539.09                     |
| Public facilities land            | 67.21                               | 203.65                 | 620.65                      | 127.85                 | 542.03                | 424.33                     |
| Parks and green land              | 68.73                               | 201.49                 | 630.73                      | 125.58                 | 542.23                | 406.21                     |
| Scenic facilities land            | 44.34                               | 174.54                 | 666.84                      | 119.01                 | 486.59                | 546.76                     |
| Military facilities land          | 84.32                               | 218.57                 | 605.50                      | 123.93                 | 463.68                | 527.04                     |

| Land-use type                | Organic matter<br>content<br>(g/kg) | Silt content<br>(g/kg) | Sand con-<br>tent<br>(g/kg) | Clay content<br>(g/kg) | TP content<br>(mg/kg) | TN con-<br>tent<br>(mg/kg) |
|------------------------------|-------------------------------------|------------------------|-----------------------------|------------------------|-----------------------|----------------------------|
| Correctional facilities land | 69.38                               | 219.48                 | 586.57                      | 134.99                 | 634.54                | 575.18                     |
| Religious land               | 57.37                               | 205.04                 | 632.97                      | 122.13                 | 587.29                | 443.33                     |
| Funeral land                 | 89.43                               | 214.47                 | 587.32                      | 135.73                 | 537.40                | 379.13                     |
| Railway land                 | 67.74                               | 224.81                 | 582.56                      | 144.31                 | 508.46                | 464.93                     |
| Highway land                 | 69.86                               | 211.10                 | 603.85                      | 133.11                 | 541.08                | 416.22                     |
| Street land                  | 72.31                               | 198.25                 | 632.10                      | 123.42                 | 562.71                | 439.06                     |
| Rural roads                  | 106.86                              | 201.73                 | 612.29                      | 132.65                 | 562.91                | 333.85                     |
| Airport land                 | 25.80                               | 163.38                 | 707.01                      | 108.91                 | 563.77                | 178.72                     |
| Port and wharf land          | 21.87                               | 192.44                 | 725.70                      | 92.04                  | 481.96                | 417.75                     |
| Pipeline transportation land | 44.48                               | 190.39                 | 627.07                      | 132.87                 | 536.49                | 291.63                     |
| River water area             | 58.76                               | 188.47                 | 655.89                      | 117.49                 | 608.37                | 321.48                     |
| Reservoir water area         | 91.56                               | 208.22                 | 603.38                      | 132.63                 | 634.98                | 366.90                     |
| Pit pond water area          | 76.29                               | 195.07                 | 634.65                      | 125.81                 | 555.05                | 333.16                     |
| Coastal mudflats             | 33.98                               | 185.29                 | 678.22                      | 116.87                 | 481.98                | 434.18                     |
| Inland mudflats              | 114.38                              | 207.22                 | 620.39                      | 125.48                 | 581.31                | 361.18                     |
| Ditch                        | 113.39                              | 197.34                 | 617.16                      | 127.40                 | 552.03                | 337.64                     |
| Water engineering land       | 63.91                               | 190.40                 | 647.50                      | 121.66                 | 566.07                | 342.21                     |
| Idle land                    | 65.48                               | 200.77                 | 619.83                      | 131.00                 | 611.46                | 397.03                     |
| Facility agricultural land   | 90.23                               | 212.10                 | 565.68                      | 149.97                 | 554.63                | 275.20                     |
| Bare land                    | 85.61                               | 205.45                 | 607.20                      | 132.75                 | 557.68                | 382.43                     |

**Table S3.** Physical value of nonpoint source pollution reduction services in each district.

| District  | Nonpoint source pol-<br>lution reduction ser-<br>vice (TN) (t) | Nonpoint source pol-<br>lution reduction ser-<br>vice (TP) (t) | Per capita nonpoint source<br>pollution reduction service<br>(TN) (t/hm <sup>2</sup> ) | Per capita nonpoint<br>source pollution reduc-<br>tion service (TP) (t/hm <sup>2</sup> ) |
|-----------|----------------------------------------------------------------|----------------------------------------------------------------|----------------------------------------------------------------------------------------|------------------------------------------------------------------------------------------|
| Baoan     | 1469.22                                                        | 3238.47                                                        | 0.04                                                                                   | 0.09                                                                                     |
| Dapeng    | 3247.69                                                        | 7296.23                                                        | 0.11                                                                                   | 0.25                                                                                     |
| Futian    | 1249.58                                                        | 815.39                                                         | 0.17                                                                                   | 0.11                                                                                     |
| Guangming | 1004.05                                                        | 1404.52                                                        | 0.06                                                                                   | 0.09                                                                                     |
| Longgang  | 4399.80                                                        | 7043.18                                                        | 0.11                                                                                   | 0.18                                                                                     |
| Longhua   | 2239.18                                                        | 1600.34                                                        | 0.13                                                                                   | 0.09                                                                                     |
| Luohu     | 2033.02                                                        | 2141.85                                                        | 0.26                                                                                   | 0.28                                                                                     |
| Nanshan   | 1655.96                                                        | 1477.15                                                        | 0.09                                                                                   | 0.08                                                                                     |
| Pingshan  | 1935.89                                                        | 4988.27                                                        | 0.12                                                                                   | 0.30                                                                                     |
| Yantian   | 1457.77                                                        | 2091.25                                                        | 0.20                                                                                   | 0.28                                                                                     |

**Table S4.** Drivers of nonpoint source pollution reduction services for major land-use types.

| First-level indicators | Second-level indicators                      | Forest land                 |                 |                             |                 | Industrial land             |                 |                             |                 | Street and town residential land |                 |                             |                 |
|------------------------|----------------------------------------------|-----------------------------|-----------------|-----------------------------|-----------------|-----------------------------|-----------------|-----------------------------|-----------------|----------------------------------|-----------------|-----------------------------|-----------------|
|                        |                                              | Surface pollution reduction |                 | Surface pollution reduction |                 | Surface pollution reduction |                 | Surface pollution reduction |                 | Surface pollution reduction      |                 | Surface pollution reduction |                 |
|                        |                                              | TN                          |                 | TP                          |                 | TN                          |                 | TP                          |                 | TN                               |                 | TP                          |                 |
|                        |                                              | <i>q</i> -value             | <i>p</i> -value | <i>q</i> -value                  | <i>p</i> -value | <i>q</i> -value             | <i>p</i> -value |
| Climate                | Annual precipitation                         | 0.3881                      | 0.0000          | 0.4397                      | 0.0000          | 0.3959                      | 0.0000          | 0.3870                      | 0.0043          | 0.3822                           | 0.0074          | 0.3982                      | 0.0000          |
|                        | Average annual temperature                   | 0.0681                      | 0.0000          | 0.1053                      | 0.0000          | 0.0561                      | 0.0000          | 0.1228                      | 0.0000          | 0.1031                           | 0.0000          | 0.1550                      | 0.0000          |
| Soil properties        | Content of sand particles                    | 0.1216                      | 0.0000          | 0.1293                      | 0.0000          | 0.1785                      | 0.0000          | 0.1719                      | 0.0000          | 0.1748                           | 0.0000          | 0.1779                      | 0.0000          |
|                        | Content of clay particles                    | 0.0761                      | 0.0000          | 0.0760                      | 0.0000          | 0.0036                      | 0.0000          | 0.0184                      | 0.0000          | 0.0107                           | 0.0000          | 0.0046                      | 0.0000          |
|                        | Content of silt particles                    | 0.0422                      | 0.0000          | 0.0600                      | 0.0000          | 0.0937                      | 0.0000          | 0.0728                      | 0.0000          | 0.0512                           | 0.0000          | 0.0560                      | 0.0000          |
|                        | Content of organic matter                    | 0.0982                      | 0.0000          | 0.0353                      | 0.0000          | 0.0293                      | 0.0000          | 0.0266                      | 0.0000          | 0.0679                           | 0.0000          | 0.0472                      | 0.0000          |
| Topography             | Elevation                                    | 0.5091                      | 0.0000          | 0.5601                      | 0.0000          | 0.6057                      | 0.0000          | 0.5385                      | 0.0000          | 0.5832                           | 0.0000          | 0.5635                      | 0.0000          |
|                        | Slope                                        | 0.6644                      | 0.0000          | 0.7920                      | 0.0000          | 0.6275                      | 0.0000          | 0.6461                      | 0.0000          | 0.6526                           | 0.0000          | 0.6714                      | 0.0000          |
| Habitat quality        | Normalized difference vegetation index, NDVI | 0.6540                      | 0.0000          | 0.6802                      | 0.0000          | 0.6362                      | 0.0000          | 0.6505                      | 0.0000          | 0.6668                           | 0.0000          | 0.6893                      | 0.0000          |
|                        | Net primary productivity, NPP                | 0.3711                      | 0.0000          | 0.3642                      | 0.0000          | 0.3639                      | 0.0000          | 0.3632                      | 0.0000          | 0.3537                           | 0.0000          | 0.3532                      | 0.0000          |
| Ecosystem type         | Ecosystem type                               | 0.3659                      | 0.0000          | 0.3837                      | 0.0000          | 0.3934                      | 0.0000          | 0.3648                      | 0.0000          | 0.3744                           | 0.0000          | 0.4154                      | 0.0000          |

| Factor | X1 | X2 | X3 | X4 | X5 | X6 | X7 | X8 | X9 | X10 | X11 |
|--------|----|----|----|----|----|----|----|----|----|-----|-----|
| X1     |    |    |    |    |    |    |    |    |    |     |     |
| X2     |    |    |    |    |    |    |    |    |    |     |     |
| X3     |    |    |    |    |    |    |    |    |    |     |     |
| X4     |    |    |    |    |    |    |    |    |    |     |     |
| X5     |    |    |    |    |    |    |    |    |    |     |     |
| X6     |    |    |    |    |    |    |    |    |    |     |     |
| X7     |    |    |    |    |    |    |    |    |    |     |     |
| X8     |    |    |    |    |    |    |    |    |    |     |     |
| X9     |    |    |    |    |    |    |    |    |    |     |     |
| X10    |    |    |    |    |    |    |    |    |    |     |     |
| X11    |    |    |    |    |    |    |    |    |    |     |     |

**Figure S1.** Interaction detection results for non-point source pollution reduction service TN (forest land); blue: nonlinear enhancement relation; green: two-factor enhancement relationship.

| Factor | X1 | X2 | X3 | X4 | X5 | X6 | X7 | X8 | X9 | X10 | X11 |
|--------|----|----|----|----|----|----|----|----|----|-----|-----|
| X1     |    |    |    |    |    |    |    |    |    |     |     |
| X2     |    |    |    |    |    |    |    |    |    |     |     |
| X3     |    |    |    |    |    |    |    |    |    |     |     |
| X4     |    |    |    |    |    |    |    |    |    |     |     |
| X5     |    |    |    |    |    |    |    |    |    |     |     |
| X6     |    |    |    |    |    |    |    |    |    |     |     |
| X7     |    |    |    |    |    |    |    |    |    |     |     |
| X8     |    |    |    |    |    |    |    |    |    |     |     |
| X9     |    |    |    |    |    |    |    |    |    |     |     |
| X10    |    |    |    |    |    |    |    |    |    |     |     |
| X11    |    |    |    |    |    |    |    |    |    |     |     |

**Figure S2.** Interaction detection results for non-point source pollution reduction service TP (forest land); blue: nonlinear enhancement relation; green: two-factor enhancement relationship.

| Factor | X1 | X2 | X3 | X4 | X5 | X6 | X7 | X8 | X9 | X10 | X11 |
|--------|----|----|----|----|----|----|----|----|----|-----|-----|
| X1     |    |    |    |    |    |    |    |    |    |     |     |
| X2     |    |    |    |    |    |    |    |    |    |     |     |
| X3     |    |    |    |    |    |    |    |    |    |     |     |
| X4     |    |    |    |    |    |    |    |    |    |     |     |
| X5     |    |    |    |    |    |    |    |    |    |     |     |
| X6     |    |    |    |    |    |    |    |    |    |     |     |
| X7     |    |    |    |    |    |    |    |    |    |     |     |
| X8     |    |    |    |    |    |    |    |    |    |     |     |
| X9     |    |    |    |    |    |    |    |    |    |     |     |
| X10    |    |    |    |    |    |    |    |    |    |     |     |
| X11    |    |    |    |    |    |    |    |    |    |     |     |

**Figure S3.** Interaction detection results for non-point source pollution reduction service TN (industrial land); blue: nonlinear enhancement relation; green: two-factor enhancement relationship.

| Factor | X1 | X2 | X3 | X4 | X5 | X6 | X7 | X8 | X9 | X10 | X11 |
|--------|----|----|----|----|----|----|----|----|----|-----|-----|
| X1     |    |    |    |    |    |    |    |    |    |     |     |
| X2     |    |    |    |    |    |    |    |    |    |     |     |
| X3     |    |    |    |    |    |    |    |    |    |     |     |
| X4     |    |    |    |    |    |    |    |    |    |     |     |
| X5     |    |    |    |    |    |    |    |    |    |     |     |
| X6     |    |    |    |    |    |    |    |    |    |     |     |
| X7     |    |    |    |    |    |    |    |    |    |     |     |
| X8     |    |    |    |    |    |    |    |    |    |     |     |
| X9     |    |    |    |    |    |    |    |    |    |     |     |
| X10    |    |    |    |    |    |    |    |    |    |     |     |
| X11    |    |    |    |    |    |    |    |    |    |     |     |

**Figure S4.** Interaction detection results for non-point source pollution reduction service TP (industrial land); blue: nonlinear enhancement relation; green: two-factor enhancement relationship.

| Factor | X1 | X2 | X3 | X4 | X5 | X6 | X7 | X8 | X9 | X10 | X11 |
|--------|----|----|----|----|----|----|----|----|----|-----|-----|
| X1     |    |    |    |    |    |    |    |    |    |     |     |
| X2     |    |    |    |    |    |    |    |    |    |     |     |
| X3     |    |    |    |    |    |    |    |    |    |     |     |
| X4     |    |    |    |    |    |    |    |    |    |     |     |
| X5     |    |    |    |    |    |    |    |    |    |     |     |
| X6     |    |    |    |    |    |    |    |    |    |     |     |
| X7     |    |    |    |    |    |    |    |    |    |     |     |
| X8     |    |    |    |    |    |    |    |    |    |     |     |
| X9     |    |    |    |    |    |    |    |    |    |     |     |
| X10    |    |    |    |    |    |    |    |    |    |     |     |
| X11    |    |    |    |    |    |    |    |    |    |     |     |

**Figure S5.** Interaction detection results for non-point source pollution reduction service TN (street and town residential land); blue: nonlinear enhancement relation; green: two-factor enhancement relationship.

| Factor | X1 | X2 | X3 | X4 | X5 | X6 | X7 | X8 | X9 | X10 | X11 |
|--------|----|----|----|----|----|----|----|----|----|-----|-----|
| X1     |    |    |    |    |    |    |    |    |    |     |     |
| X2     |    |    |    |    |    |    |    |    |    |     |     |
| X3     |    |    |    |    |    |    |    |    |    |     |     |
| X4     |    |    |    |    |    |    |    |    |    |     |     |
| X5     |    |    |    |    |    |    |    |    |    |     |     |
| X6     |    |    |    |    |    |    |    |    |    |     |     |
| X7     |    |    |    |    |    |    |    |    |    |     |     |
| X8     |    |    |    |    |    |    |    |    |    |     |     |
| X9     |    |    |    |    |    |    |    |    |    |     |     |
| X10    |    |    |    |    |    |    |    |    |    |     |     |
| X11    |    |    |    |    |    |    |    |    |    |     |     |

**Figure S6.** Interaction detection results for non-point source pollution reduction service TP (street and town residential land); blue: nonlinear enhancement relation; green: two-factor enhancement relationship.
